# Supplementary material for: Analyzing the value of NUSAP1 in hepatocellular carcinoma from clinical and molecular mechanism perspectives: Bioinformatics-based approach.
Source: Research Square preprint supplement (doi:10.21203/rs.3.rs-106028/v1), 2020-11-13
Supplement: Supplementary file 1 [file e37ac1797739dd17b92507ef.xlsx]

## Sheet: Sheet1
DEGs in GSE62232, GSE112790, GSE121248 and GSE102079：
GSE62232			GSE112790			GSE121248			GSE102079
Genesymbol	LogFC	P-Value	Genesymbol	LogFC	P-Value	Genesymbol	LogFC	P-Value	Genesymbol	LogFC	P-Value
CBX8	2.0267	6.62e-41	CLEC4M	-4.01246	3.78809e-62	BCL9	2.31828	1.6943e-67	BCL9	2.24465	1.1875e-124
CLEC4M	-4.29586	1.61e-40	ASPG	-2.81554	5.56759e-58	CTC-338M12.4	2.0793	2.23178e-49	ASPG	-2.35171	1.44174e-105
ALG1	2.3468	6.79e-33	MYOM2	-2.08165	2.3096e-52	PTTG3P	2.32384	1.97079e-48	CLEC4M	-3.52133	4.09066e-103
BCL9	2.89302	1.34e-32	ALG1	2.34625	3.79697e-47	ALG1	2.09653	1.9958e-47	CLEC1B	-4.0004	1.90587e-101
CTC-338M12.4	2.07084	4.1e-29	BCL9	2.33687	1.43971e-46	C5orf34	2.79967	1.77906e-46	FCN2	-2.34906	1.02814e-96
TFF2	-2.57374	3.33e-28	CYP2C19	-3.64066	4.15344e-45	RBM12B	2.12078	2.08467e-45	CLEC4G	-3.60814	7.72576e-91
CYP2C19	-4.13788	1.16e-26	CAP2	4.17705	1.32872e-43	CDH13	2.53812	8.12358e-44	CXCL14	-2.69316	1.79778e-89
CFP	-2.40387	5.02e-25	FITM1	-2.18398	5.24745e-43	CENPH	2.96892	9.00738e-44	CKAP2L	2.34371	7.63125e-88
FITM1	-2.90578	4.26e-24	FCN2	-2.38601	2.4344e-38	LINC00528	2.12379	6.96301e-43	CFP	-2.69832	2.56383e-85
FCN2	-2.66674	7.11e-24	SLITRK3	-2.50868	4.59213e-34	LOC102724275	2.24537	6.01415e-41	OIT3	-3.92499	1.79158e-83
CLEC4G	-3.77637	3.52e-23	IGFALS	-3.10059	8.7325e-33	RAD54L	2.0407	1.00875e-40	NPY1R	-2.81989	2.10384e-78
KCNN2	-4.4533	1.79e-22	CLEC1B	-3.97351	3.23832e-32	ZNF792	2.23794	2.37535e-39	FCN3	-4.17206	4.77231e-78
NPY1R	-3.43508	4.73e-22	CLEC4G	-3.48363	3.1357e-30	CENPL	2.589	2.86525e-38	CAP2	2.98055	2.56734e-77
CLEC1B	-3.87754	1.48e-21	KCNN2	-4.16547	1.20265e-29	CKAP2L	2.43976	4.60679e-37	CRHBP	-3.82964	3.42477e-77
SASS6	2.00133	1.15e-20	RFX5	2.0533	1.53719e-28	METTL18	2.13396	7.70402e-37	FOXM1	2.84138	1.04747e-74
MIR34A	2.04511	1.87e-20	RACGAP1	3.66387	2.68408e-28	ZEB1-AS1	2.02648	3.08346e-36	STIL	2.06116	3.96012e-71
ECM1	-2.28468	3.54e-20	NSMCE2	2.4088	6.92576e-28	C1orf112	2.54798	6.55672e-35	UBE2C	2.82065	7.19378e-70
LYVE1	-2.89017	1.49e-19	HSPB1	2.38479	1.21248e-27	TOP2A	3.67547	1.46992e-34	IGFALS	-2.4243	9.69331e-70
PZP	-3.79694	1.74e-19	PEA15	2.09484	2.62731e-27	CENPW	2.96929	4.92055e-34	UBE2T	2.76408	3.15764e-69
RSPO3	-2.54967	1.8e-19	LINC01093	-5.06348	5.63729e-27	MSH2	2.37947	1.83726e-33	COLEC10	-2.09531	8.91488e-68
DSN1	2.28839	2.57e-19	TP53BP2	2.11966	9.85567e-27	SLC26A2	2.16933	1.87319e-33	DPT	-2.10224	4.58682e-67
TSIX	-2.57044	3.91e-19	CXCL14	-2.65248	8.7e-26	RAD51AP1	3.22647	2.16586e-33	TOP2A	2.77068	7.50923e-67
LOC338620	2.27567	1.47e-18	CXCR2	-2.28889	1.24386e-25	E2F8	3.32945	2.76391e-33	MELK	2.69268	1.05051e-66
CXCL14	-2.60112	2.83e-18	LOC100129447	-2.05612	1.65071e-25	RACGAP1	3.05484	7.7469e-33	LINC01093	-4.25321	1.29312e-66
RAD51AP1	3.09121	2.74e-17	FOSB	-3.62914	3.44171e-25	NEK2	2.88721	8.91972e-33	RSPO3	-2.55909	2.19238e-66
OIT3	-4.08491	3.5e-17	SPDL1	2.23795	9.95157e-25	RCN2	2.12926	1.10965e-32	RACGAP1	2.84267	1.03762e-65
IGFALS	-2.80922	3.95e-17	CFP	-2.30942	5.73585e-24	NCAPG2	2.06049	1.21508e-32	CENPW	2.58822	5.55585e-65
CENPH	2.61961	4.33e-17	RRM2	4.10208	9.27985e-24	ASPM	3.56188	1.59574e-32	IGK	-2.20411	6.63278e-65
MSH2	2.24109	4.41e-17	IL1RAP	-2.91878	9.50778e-24	TAF1A	2.08088	2.00002e-32	CHST4	-2.28887	1.61079e-64
CAP2	3.49809	6.41e-17	HMGN1	2.03374	1.99216e-23	KIF2C	2.04999	3.06854e-32	PRC1	3.12575	1.0464e-63
ZNF563	2.14753	6.43e-17	CENPW	3.13339	2.05378e-23	MCM3	2.01261	4.98747e-32	CCNB1	3.0041	2.57251e-63
TFPI2	-2.75844	9.03e-17	CKAP2L	2.21542	6.99308e-23	FOXM1	2.73423	5.89712e-32	SP5	2.76534	7.55847e-63
STIL	2.10759	1.09e-16	OIT3	-3.71453	9.86296e-23	SHCBP1	2.87022	5.9148e-32	EZH2	2.55474	7.90587e-63
FREM2	-2.77736	1.71e-16	TUBG1	2.06561	1.48489e-22	CDK1	2.75755	8.49263e-32	HMMR	2.76584	1.44278e-62
RRM2	4.02068	2.23e-16	RAD51AP1	3.04903	1.56098e-22	KIF18A	2.00872	9.43849e-32	FLVCR1	2.45819	6.94141e-62
MARCO	-2.2733	3.48e-16	PODXL	2.72223	1.73996e-22	CENPQ	2.08437	1.7378e-31	MARCO	-2.62591	3.21059e-61
CAPN3	-2.52179	7.52e-16	RNASEH2A	2.25975	2.35331e-22	OIP5	2.78916	1.99169e-31	NEK2	2.26312	1.83914e-60
CDKN2C	2.17671	1.79e-15	UBE2T	3.1209	4.79418e-22	UBE2T	3.02046	2.33549e-31	KIAA0101	2.0832	3.65901e-60
PLVAP	2.3782	2.39e-15	AKR1C3	2.2616	5.31543e-22	KIF15	2.68292	4.32047e-31	GPR128	-2.45221	1.29464e-59
ASPA	-2.34326	2.62e-15	NUSAP1	3.10385	1.1357e-21	NCAPG	3.41451	7.06812e-31	CYP2B6	-2.77555	3.21682e-59
CRHBP	-4.1592	6.93e-15	KIAA0101	2.48382	1.46968e-21	CELSR3	2.03432	8.02395e-31	RRM2	3.462	1.61273e-58
ITGA6	2.3921	7.05e-15	PZP	-2.58476	1.86153e-21	DEPDC1	2.62316	1.27272e-30	INMT	-2.26	1.87857e-58
ANGPTL1	-2.29781	1.03e-14	NPY1R	-2.672	2.67154e-21	ZNF623	2.05095	1.48909e-30	CDK1	2.10367	5.73296e-58
PRC1	3.24445	1.44e-14	CRHBP	-3.72392	2.92144e-21	ESM1	2.80396	3.14404e-30	FAM83D	2.7865	1.89871e-57
DOK5	-2.08061	1.72e-14	TP53I3	2.76457	2.99045e-21	PRC1	3.32681	4.3914e-30	DIRAS3	-2.45382	5.64237e-57
IDO2	-3.11763	2.31e-14	HMMR	3.16467	5.77951e-21	CDKN3	3.24671	6.3423e-30	TFPI2	-2.14635	7.43118e-57
SHCBP1	2.57159	2.45e-14	MARCO	-2.37359	6.8804e-21	DTL	2.9328	6.7847e-30	RBM24	3.23634	8.54432e-57
CYP26A1	-3.70467	2.61e-14	LAMC1	2.0157	7.24981e-21	TRIP13	2.28486	7.48022e-30	E2F8	2.33577	3.34591e-56
KIF20A	3.05439	2.92e-14	CNDP1	-4.60043	1.73691e-20	HELLS	2.08735	8.0662e-30	KIF15	2.08957	5.68327e-56
RACGAP1	3.05177	3.33e-14	ITGA6	2.15355	2.1629e-20	TCF19	2.10785	9.82857e-30	GINS1	2.95638	1.43463e-55
ZNF623	2.34393	4.22e-14	CENPL	2.19066	4.66011e-20	OLFML2B	2.43739	1.39854e-29	DTL	2.69411	6.02907e-55
TIGD1	2.28795	5.01e-14	PRC1	3.36463	7.60401e-20	STIL	2.10735	1.66687e-29	CDKN3	2.90206	7.32447e-55
UBE2C	2.75194	6.16e-14	CYP26A1	-3.17411	7.78764e-20	C5orf30	2.44619	3.19345e-29	KIF20A	2.61607	1.08154e-54
UBE2T	2.86997	9.27e-14	UBE2C	2.96838	8.87532e-20	CCNB1	3.42759	4.80373e-29	RAD51AP1	2.31774	1.17435e-54
HMMR	2.91284	1.04e-13	DTL	3.20503	1.86498e-19	FCN2	-2.08355	9.79181e-29	ASPM	2.18155	1.97457e-54
UBE2S	2.45627	1.29e-13	PLVAP	2.23142	2.10826e-19	MAD2L1	2.20602	1.27539e-28	NCAPG	2.64646	7.3623e-54
KIAA0101	2.02261	2.19e-13	FCN3	-3.89274	2.79782e-19	ANLN	3.19301	2.95659e-28	TMEM27	-3.52972	1.51113e-53
AURKA	2.05698	2.7e-13	RSPO3	-2.57818	4.74911e-19	CFP	-2.21259	3.10912e-28	NUSAP1	2.40532	1.82481e-53
CCNB1	2.99773	2.72e-13	TOP2A	2.84348	6.79159e-19	CAP2	2.68353	3.60853e-28	SGOL2	2.06638	3.52677e-53
FCN3	-3.83004	3.55e-13	GINS1	3.37776	8.13368e-19	KIF23	2.43551	3.62566e-28	ATAD2	2.13172	4.45988e-53
TOP2A	2.76729	3.7e-13	LYVE1	-2.34559	9.53407e-19	KIF20A	3.22434	4.71596e-28	BUB1B	2.61088	5.5632e-53
SLC38A6	2.0312	6.56e-13	TIGD1	2.33976	2.41091e-18	CLEC4M	-2.94212	5.01267e-28	ZIC2	3.06014	8.41323e-53
CNDP1	-5.11325	1.3e-12	FLVCR1	2.65873	3.93251e-18	HMMR	2.67361	9.64585e-28	TRIP13	2.21589	4.91652e-52
FABP5	2.7706	1.46e-12	CDK1	2.42026	4.17539e-18	KIF14	2.67372	1.17425e-27	CETP	-2.43814	5.646e-52
DIRAS3	-3.05301	1.67e-12	CCNB1	3.21406	5.13529e-18	CENPE	2.3999	1.26318e-27	TTK	2.87422	6.91829e-52
MCM2	2.11569	1.95e-12	BUB1B	3.19615	5.87313e-18	UBE2C	2.63129	1.68997e-27	NUF2	2.77771	9.32131e-52
C1orf112	2.30243	3.1e-12	FOXM1	2.6058	8.1022e-18	RRM2	3.36309	3.00256e-27	CXCL12	-2.76761	1.16011e-51
ZGPAT	-2.64432	4.47e-12	HJURP	2.09176	9.93545e-18	CDC20	3.09749	4.44187e-27	CYP26A1	-2.83452	1.22396e-51
BUB1B	2.71617	4.59e-12	OSBPL3	2.11406	2.0634e-17	MCM10	2.12999	4.87392e-27	CDC20	2.69962	1.48394e-51
CYP2B6	-3.41943	8.95e-12	GMNN	2.44536	2.25444e-17	HOXA13	2.49222	6.1766e-27	DLGAP5	2.72838	3.51871e-51
IL32	3.51404	9.1e-12	DBF4	2.1526	2.71823e-17	CHST4	-2.07276	7.00465e-27	CDC7	2.1257	1.20381e-50
TP53I3	2.28186	1.14e-11	MID1IP1	2.10198	3.17356e-17	COL15A1	3.92555	7.26505e-27	CLDN10	-2.23557	9.12096e-50
FOXM1	2.39059	1.19e-11	ELOVL2-AS1	2.19445	3.26032e-17	MELK	2.50269	8.12279e-27	MT1H	-2.89118	5.27946e-49
CENPW	2.14142	1.2e-11	AADAT	-2.17752	3.54926e-17	CENPK	2.80292	9.97492e-27	MT1F	-3.12889	1.58272e-48
CDK1	2.26543	1.54e-11	IYD	-2.49323	3.6755e-17	TTK	3.04566	1.22751e-26	ANLN	2.47883	1.64887e-48
PLAC8	-2.37319	1.73e-11	ROBO1	4.08853	5.27119e-17	OTUD6B	2.13063	2.05802e-26	SHCBP1	2.08694	2.48383e-48
TRIP13	2.30637	1.8e-11	CDKN3	3.29103	5.90978e-17	EZH2	2.28968	2.44326e-26	PLAC8	-2.80455	6.27084e-48
PBK	2.98472	2.14e-11	CXCL2	-2.03508	6.60669e-17	CDC6	2.20303	3.02875e-26	CYP1A2	-3.74498	7.06034e-48
ZWINT	2.60842	2.25e-11	MELK	2.56076	6.6201e-17	NUSAP1	2.62914	3.50627e-26	MT1E	-2.92682	5.3185e-47
DTL	3.07889	2.76e-11	E2F8	2.65692	8.02005e-17	OIT3	-3.30851	4.65937e-26	CCNA2	2.23152	1.5182e-46
NUSAP1	2.46015	2.82e-11	TOMM40L	2.02067	8.22729e-17	KPNA2	2.04164	4.69244e-26	PBK	2.86733	2.39328e-46
GINS1	3.07142	3.08e-11	COL4A1	2.35743	8.77157e-17	PBK	3.54012	8.42505e-26	MT1G	-2.0409	6.93019e-46
EZH2	2.48574	3.08e-11	NEK2	2.47432	1.01797e-16	RSPO3	-2.35285	1.07815e-25	CD5L	-2.29001	7.24589e-46
ASCL1	-3.48343	3.44e-11	RFC4	2.21049	1.14849e-16	SGOL2	2.3987	1.10791e-25	CNDP1	-3.60244	8.91612e-46
CCNA2	2.16237	4.3e-11	GPR128	-2.45083	1.81596e-16	NUF2	3.51551	1.17148e-25	C7	-2.68135	1.51454e-45
MICB	2.28882	4.44e-11	IDO2	-2.59129	1.95002e-16	UHRF1	2.85901	1.26794e-25	RND3	-2.03973	5.59312e-45
COL15A1	3.95672	5.39e-11	CYP2B6	-2.89974	2.08916e-16	NEIL3	2.01764	1.39034e-25	HAMP	-4.71701	9.47108e-45
APOBEC3B	3.05621	5.6e-11	COL15A1	3.83009	2.41802e-16	TRIM6	2.44279	1.4363e-25	SMIM24	-3.02915	1.16169e-44
CETP	-2.07917	5.98e-11	CYP1A2	-4.22337	2.49376e-16	DLGAP5	2.97171	1.48466e-25	FREM2	-2.616	1.78691e-44
SGOL2	2.2056	7.59e-11	RND3	-2.45098	2.71224e-16	BUB1B	2.97512	1.63069e-25	NDC80	2.3899	4.67556e-44
XIST	-4.84855	1.12e-10	OTUD6B	2.0115	2.89807e-16	NDC80	2.63587	2.33647e-25	ST8SIA6-AS1	2.51146	1.16491e-43
SLC16A4	-3.15415	1.15e-10	KIF20A	2.89027	3.92953e-16	KIF11	2.58154	2.76269e-25	IDO2	-2.41451	1.5545e-43
APOA5	-2.83775	1.18e-10	FAM83D	2.84071	6.48782e-16	FLVCR1	2.08153	5.49619e-25	MT1M	-4.28186	2.9608e-43
NDC80	2.62198	1.27e-10	FOS	-3.51061	6.54179e-16	DEPDC1B	2.8036	7.6419e-25	BCO2	-2.56696	4.31463e-43
AADAT	-2.25717	1.47e-10	NDC80	3.02851	7.5038e-16	RBM24	3.60053	9.31349e-25	MT2A	-2.22458	5.18614e-43
DLGAP5	2.79777	1.65e-10	SLC38A6	2.03155	8.4673e-16	GINS1	2.85403	1.20692e-24	ROBO1	3.14705	9.04739e-43
CD5L	-2.02521	1.73e-10	SP5	2.77345	1.05829e-15	CDC7	2.16819	1.96381e-24	KIF4A	2.19297	1.38211e-42
TMEM55A	2.30082	2.05e-10	LPA	-3.26461	1.56886e-15	PTTG1	2.29408	2.22313e-24	MT1HL1	-2.20078	3.2845e-42
MT1G	-2.55521	2.64e-10	SGOL2	2.32479	1.63543e-15	CEP55	2.63764	2.65221e-24	TIMD4	-2.12177	6.48248e-42
NCAPG	2.50935	2.92e-10	EZH2	2.43306	2.16392e-15	COL4A1	2.16687	3.66001e-24	DEPDC1B	2.03776	7.25363e-41
LINC01093	-3.8089	3.13e-10	DIRAS3	-2.35424	2.71369e-15	DUXAP10	2.94828	3.95012e-24	DUXAP10	2.02321	1.20016e-40
CCL18	2.64775	3.71e-10	SHCBP1	2.46537	2.95944e-15	SPC25	2.50419	4.25642e-24	SULT1C2	2.47578	1.34711e-40
ASPM	2.27417	5.53e-10	ATAD2	2.32919	4.00774e-15	MND1	2.33243	4.55216e-24	CD1D	-2.01951	2.55535e-40
IL13RA2	-2.34035	6.01e-10	MT1H	-3.3592	4.30804e-15	SLC38A6	2.10517	5.49346e-24	FBP1	-2.06525	2.9455e-40
NEK2	2.16375	8.05e-10	SERPINE1	-2.71021	4.32152e-15	KIF4A	2.60687	1.15361e-23	TTC36	-2.61744	2.99668e-40
TPX2	2.31569	9.33e-10	ASPM	2.38761	4.84694e-15	CLEC1B	-2.67455	1.98406e-23	COL15A1	3.01805	4.41513e-40
CDC20	2.29935	9.89e-10	PTTG1	2.31405	5.06878e-15	COLCA2	2.06862	5.16894e-23	APOF	-3.34285	6.30299e-40
PHYHIPL	2.20081	1.02e-09	HAMP	-5.06056	5.18904e-15	SERPINI1	2.22972	5.84046e-23	HAO2	-2.93716	1.61643e-39
CEP55	2.19531	1.51e-09	NCAPG	2.84867	7.05993e-15	EIF5A2	2.10675	2.65517e-22	LPA	-2.64841	4.89012e-39
KIF14	2.33863	1.68e-09	UHRF1	2.6222	1.01101e-14	ATAD2	2.09435	3.37531e-22	NAT2	-2.63534	1.69566e-37
E2F8	2.51725	1.71e-09	MT1F	-3.48064	1.08227e-14	GAS2L3	2.18234	3.58925e-22	CRNDE	2.36523	2.43298e-37
TTK	2.59459	1.99e-09	BCO2	-3.14927	1.3654e-14	FAM83D	2.55789	3.68676e-22	IRX3	2.25125	9.10112e-37
MT1F	-3.57945	2.11e-09	MT1M	-5.05651	1.73161e-14	NPY1R	-2.35737	6.61838e-22	LY6E	-2.02921	1.53433e-36
TXLNGY	2.30862	2.19e-09	MCM2	2.29762	2.1099e-14	KCNN2	-3.3785	1.52387e-21	CYP4A11	-2.25012	3.15433e-35
KDM5D	2.95137	2.61e-09	CDC20	2.95264	2.78855e-14	LPL	2.18248	2.03914e-21	SLC25A47	-2.53083	7.42306e-35
GSTZ1	-2.14851	2.66e-09	CDC7	2.24818	3.11248e-14	ITGA2	2.05746	2.53736e-21	KCNN2	-2.8365	1.11974e-34
SLC16A10	-2.35746	2.7e-09	PBK	3.20806	3.77536e-14	UBE2S	2.01611	4.35365e-21	STK39	2.33432	1.37926e-34
FLVCR1	2.35013	3.31e-09	MSH2	2.07112	5.08289e-14	SLC22A4	2.15158	7.8622e-21	SRPX	-2.33906	1.81244e-34
ATAD2	2.09369	3.68e-09	DLGAP5	2.97737	6.02214e-14	IDO2	-3.21301	2.64115e-20	SLC22A1	-3.9378	2.6483e-34
CKS2	2.10208	3.79e-09	MT1G	-2.25915	6.8316e-14	SMYD3	2.12802	3.53448e-20	MT1X	-2.31451	9.02178e-34
RPS4Y1	4.6164	4.4e-09	COL4A2	2.14806	8.5988e-14	CNDP1	-3.52302	6.83786e-20	CNTN3	-2.53487	1.04994e-33
GSTA3	-2.25048	4.45e-09	PLGLB2	-2.17005	1.14663e-13	ZIC2	3.1976	2.00609e-19	FOSB	-2.25419	1.22793e-33
CDKN3	2.62318	6.09e-09	KIF15	2.14453	1.16559e-13	PCDHGA4	2.24317	3.87805e-19	FOS	-2.32996	4.41365e-33
FAT1	2.71212	6.53e-09	RBM24	3.21176	1.24833e-13	IGF2BP3	2.27586	4.79802e-19	HGFAC	-2.46701	6.34252e-33
PHGDH	-2.27179	8.4e-09	KIF14	2.18943	1.57479e-13	CYP1A2	-3.23583	4.8829e-19	LOC344887	2.24441	4.37526e-32
MT1M	-4.77723	9.28e-09	LAMP3	2.55098	1.7016e-13	MNS1	2.5983	1.06736e-18	CYP3A4	-2.18726	5.23598e-32
GADD45G	-2.14116	9.79e-09	TRIP13	2.26484	1.78729e-13	ROBO1	2.53489	1.07452e-18	GHR	-2.45039	1.01658e-31
TMEM27	-3.36617	9.92e-09	KIF4A	2.61387	3.4601e-13	GPR158	2.07319	2.34612e-18	TRIM71	2.52992	1.69861e-31
NUF2	2.74741	1e-08	ZIC2	3.19922	4.28815e-13	CRHBP	-2.45471	2.53494e-18	RDH16	-2.22576	1.99364e-31
ANLN	2.38014	1.24e-08	CETP	-2.10787	5.64956e-13	FCN3	-2.8513	5.54226e-18	IGJ	-2.76729	1.37887e-29
KIF11	2.14316	1.83e-08	NUF2	2.85837	7.94133e-13	LOC344887	3.09942	8.29036e-18	AFM	-2.56496	3.83159e-29
UHRF1	2.61881	2.12e-08	APOF	-3.93092	9.13038e-13	LINC01093	-3.31666	1.25328e-17	COX7B2	2.76887	4.72871e-29
CYP1A2	-3.81705	2.12e-08	TTK	2.90521	1.28716e-12	CRNDE	2.96739	3.90646e-17	CYP2C9	-2.02122	1.47842e-28
GPR128	-2.79214	2.17e-08	ARHGEF3	2.03558	1.43879e-12	CYP26A1	-2.22188	7.68835e-17	GPC3	2.14135	4.72536e-28
OAT	-3.5705	2.31e-08	ZWINT	2.26455	1.45907e-12	SLC25A47	-2.34681	7.90445e-17	C3P1	-2.18698	2.23905e-27
ZSCAN31	2.49228	2.85e-08	ANLN	2.58857	2.46933e-12	ZWINT	2.06186	8.48075e-17	CLRN3	-2.76457	2.88311e-27
CCL20	4.29136	2.94e-08	CFHR3	-2.47419	3.03553e-12	MAP2	2.11239	1.23056e-16	IL13RA2	-2.05116	1.23859e-26
G6PD	2.0572	3.04e-08	MT1E	-3.08279	3.29401e-12	THBS4	2.05714	1.70406e-16	PGLYRP2	-2.49032	2.20653e-26
CENPK	2.15478	4.36e-08	UBE2S	2.09082	5.70135e-12	IRX3	2.68641	2.14604e-16	CTHRC1	2.60109	3.44162e-26
ESM1	2.16149	5.35e-08	TMEM27	-3.32744	5.71266e-12	SLC22A15	2.15157	3.57718e-16	GBA3	-2.51576	3.61473e-26
MT1E	-3.2001	5.46e-08	SLC51B	2.51275	6.80159e-12	FABP5	2.20265	3.94847e-16	GNMT	-2.59356	9.62127e-26
NAT2	-2.89855	5.53e-08	AKR1B10	5.41131	8.04597e-12	GPC3	2.95446	6.43951e-16	SLCO1B3	-3.2627	1.26916e-25
COL4A2	2.04375	6.41e-08	TTC36	-2.93015	9.53494e-12	SLC51B	2.14184	9.39256e-16	AKR1D1	-2.83887	5.30556e-25
FLJ22763	-2.60784	7.68e-08	CXCL10	3.11606	1.78236e-11	SPINK1	5.16815	2.62346e-15	GYS2	-2.53594	9.3897e-24
HOXA13	2.1323	8.79e-08	PHYHIPL	2.06608	2.23864e-11	FAM133A	2.63545	3.33977e-15	C9	-3.2154	2.47654e-23
AKR1B10	5.19596	1.16e-07	CCNA2	2.30993	2.29955e-11	ACSL4	2.79053	3.79331e-15	SPP2	-2.38329	3.56478e-23
LAPTM4B	2.36108	1.28e-07	MT2A	-2.4063	2.34674e-11	CLEC4G	-2.10738	4.88488e-15	GLYAT	-2.00533	7.69539e-23
FAM83D	2.09048	1.31e-07	MT1HL1	-2.38548	2.38036e-11	NAT2	-2.32949	5.86932e-15	PCK1	-2.40364	1.54596e-22
C5orf27	-3.38506	1.33e-07	MNS1	2.57075	2.70711e-11	HAMP	-3.88685	7.24759e-15	SPINK1	3.9326	3.20814e-22
ACSM3	-2.66222	1.45e-07	TSLP	-2.5735	2.99493e-11	TRIM71	2.66138	8.95199e-15	TMEM45A	-2.14835	1.7277e-21
EIF1AY	3.26306	1.74e-07	TRIM6	2.29882	3.82644e-11	ADAMDEC1	2.18197	2.24248e-14	BHMT	-2.09916	5.09486e-21
FOLH1B	-2.2747	1.8e-07	FBP1	-2.38198	5.71248e-11	CXCL12	-2.17865	3.03668e-14	CYP2A6	-2.38976	6.74632e-21
HAO2	-3.35458	1.87e-07	PIR	2.08656	6.29391e-11	STK39	2.29275	6.01748e-14	CLGN	2.19188	1.2238e-20
RBM24	2.92547	1.91e-07	CYP4A11	-2.76265	6.50327e-11	CTHRC1	3.42622	7.72355e-14	MAGEA6	2.77937	1.94579e-19
TTC36	-2.82242	2.01e-07	MT1X	-2.83467	8.25495e-11	SULT1C2	2.19709	9.17261e-14	PEG10	2.55408	6.52047e-19
GPC3	2.81875	2.35e-07	HGFAC	-2.95843	1.06999e-10	ISX	2.01662	7.89587e-13	SLC10A1	-2.08131	1.38845e-18
TRIM6	2.1361	2.38e-07	STK39	2.78492	1.30386e-10	C15orf48	2.65496	1.43926e-12	AKR1B10	3.12524	1.76921e-18
LPA	-2.51379	3e-07	SLC25A47	-2.99549	1.78656e-10	C12orf75	2.07077	1.73737e-12	CYP8B1	-2.3295	2.7484e-18
ACSL4	2.83307	3.39e-07	MDK	2.36009	2.21921e-10	HOXC6	2.01417	2.15761e-12	LINC01419	2.46155	5.21731e-18
MT1HL1	-2.56413	3.72e-07	KIF11	2.14924	2.36912e-10	TMEM27	-2.46139	5.39522e-12	LINC00844	-2.74721	5.27847e-18
BCO2	-2.40581	3.76e-07	GREM2	-2.06651	3.53567e-10	MAGEA12	2.59624	6.17155e-12	ADH1C	-2.06167	2.43932e-17
EFHD1	-2.17548	4.89e-07	PLAC8	-2.48655	3.76073e-10	SPP1	2.34785	8.68218e-12	FETUB	-2.06679	4.93079e-17
GLYAT	-2.69513	5.01e-07	APOBEC3B	2.66753	3.84943e-10	APOF	-2.5853	1.64708e-11	F9	-2.088	4.94765e-17
IRX3	2.77542	5.28e-07	MAP2	2.26063	4.73374e-10	CD24	2.17787	2.53141e-11	CYP2E1	-2.86413	1.35755e-16
CYP3A4	-2.46087	5.39e-07	APOA5	-2.25353	4.8301e-10	FREM2	-2.47569	4.89842e-11	THRSP	-2.00269	7.61879e-15
SLCO1B3	-4.64195	5.47e-07	C8A	-2.29233	5.95579e-10	COX7B2	2.72176	5.21553e-11	HPD	-2.11244	9.13271e-14
C1orf106	2.30817	5.87e-07	SOWAHA	2.07413	7.53144e-10	CCL20	2.9846	7.59178e-11	S100P	2.23891	9.80055e-14
GHR	-2.72381	6.95e-07	SLC39A10	2.00186	8.35409e-10	ARPC3	2.05814	1.17781e-10	NQO1	2.08361	3.08967e-13
UPP2	-2.50551	9.14e-07	SULT1C2	2.53609	1.30915e-09	PEG10	2.60827	1.34658e-10	EPCAM	-2.15202	1.65999e-11
CXCL12	-2.55952	1.26e-06	CXCL12	-2.33729	1.63924e-09	MAGEA6	3.31006	2.2244e-10
MT1H	-2.71687	1.27e-06	C8orf4	-2.11542	1.71081e-09	CLRN3	-2.32949	2.54369e-10
ZIC2	2.92876	1.54e-06	FOLH1B	-2.17884	1.97757e-09	MEP1A	2.06745	2.9772e-10
TOX3	2.20638	1.67e-06	DEPDC1B	2.05755	2.15781e-09	FLJ22763	-2.14624	3.43127e-10
MT2A	-2.44352	1.68e-06	ACSL4	2.26801	2.57935e-09	MMP12	2.48397	7.28259e-10
LOC344887	2.66211	1.72e-06	IRX3	2.39093	4.40138e-09	MAGEA1	2.11087	9.51297e-10
RDH16	-2.48815	1.86e-06	NAT2	-2.6505	4.66202e-09	NQO1	2.28622	1.40261e-09
SLC25A47	-2.59909	2e-06	ACSM3	-2.14535	4.70448e-09	CLGN	2.29783	1.57798e-09
HAMP	-4.0265	2.13e-06	G6PD	2.25698	5.25227e-09	HAO2	-2.1395	2.34841e-09
CTHRC1	3.30635	2.21e-06	CRNDE	2.40676	1.04106e-08	AKR1B10	3.24263	2.95745e-09
SP5	2.16191	2.53e-06	EPDR1	2.00356	1.17173e-08	S100P	2.75792	3.00082e-09
CRNDE	2.48128	3.42e-06	FABP5	2.06088	1.60129e-08	LINC01419	2.75163	3.46481e-09
FBP1	-2.11641	3.7e-06	SMIM24	-2.22528	1.78855e-08	PDZK1IP1	2.20323	3.48388e-09
FGF13	2.62365	3.96e-06	HAO2	-2.75944	2.00793e-08	LYZ	2.07292	4.68665e-09
ZNF468	2.08629	4.68e-06	KMO	-2.17047	2.23327e-08	BBOX1	-2.41199	7.16118e-09
GPX2	2.21893	5.07e-06	CYP3A4	-2.33893	2.61446e-08	GBA3	-2.01324	2.79837e-08
FXYD1	-2.50923	5.5e-06	SLCO1B3	-4.00808	3.0841e-08	SLC22A1	-2.44089	2.80289e-08
FKBP1B	2.82464	5.63e-06	C5orf27	-3.28285	3.81019e-08	LCN2	2.25893	3.49603e-08
SLC22A1	-3.77944	5.84e-06	C1orf106	2.34538	4.60784e-08	AKR1D1	-2.36432	9.49252e-08
GBA3	-3.29206	7.95e-06	CTHRC1	3.21283	4.969e-08	GYS2	-2.22948	1.76178e-07
TMEM45B	2.7658	8.63e-06	C12orf75	2.35019	5.94448e-08	THRSP	-2.21081	2.39002e-07
CYP4A11	-2.08249	9.56e-06	GHR	-2.49463	8.93283e-08	ALDH3A1	2.08348	2.61415e-07
SULT1C2	2.05501	1.03e-05	COL1A2	2.04431	1.27532e-07	IGJ	-2.12353	4.18695e-07
SLC51B	2.13176	1.11e-05	SLC22A1	-3.95873	1.35023e-07	MT1M	-2.29192	6.36593e-07
APOF	-3.01922	1.24e-05	SLC16A4	-2.01973	1.65351e-07	SLCO1B3	-2.36098	6.74756e-07
MT1X	-2.49461	1.29e-05	ANXA10	-2.24191	2.02971e-07	CNTN3	-2.00983	1.88592e-06
ROBO1	2.7242	1.29e-05	SPINK1	4.70375	2.21574e-07	DKK1	2.14706	8.23599e-06
STK39	2.08739	1.82e-05	LOC344887	2.25811	2.31887e-07	C9	-2.28124	1.54892e-05
LCN2	3.03558	2.54e-05	FLJ22763	-2.28626	2.68778e-07
CXCL10	2.22352	2.72e-05	BCHE	-2.91327	2.87944e-07
GNMT	-2.74793	3.28e-05	GNMT	-2.88792	2.95059e-07
LINC00844	-3.74915	3.81e-05	IL13RA2	-2.13935	3.05555e-07
CYP2B7P	-2.44374	4.01e-05	GYS2	-3.03604	4.05769e-07
TRIM71	2.52802	4.31e-05	FXYD1	-2.28072	4.94875e-07
KMO	-2.01781	5.1e-05	CCL20	3.0221	5.67485e-07
SPARCL1	2.02073	5.26e-05	SULT1E1	-2.20768	6.74458e-07
XK	2.3092	5.95e-05	ZNF468	2.01143	7.12359e-07
FOS	-2.15359	6.65e-05	GBA3	-2.73913	9.31384e-07
SPINK1	4.49827	7.3e-05	FGF13	2.43301	9.3435e-07
SRPX	-2.21796	7.43e-05	CLRN3	-2.93409	9.55382e-07
BBOX1	-2.60451	7.69e-05	RDH16	-2.17951	9.59341e-07
MUC13	2.04503	8.78e-05	LINC00844	-3.66526	1.09272e-06
CYP3A7-CYP3AP1	-2.00025	0.000112672	MLLT11	2.05798	1.3871e-06
PDZK1IP1	2.67739	0.000115821	AFM	-2.5414	1.51798e-06
CYP2A6	-2.83779	0.000182026	CYP2C9	-2.06853	1.58197e-06
CYP2A7	-2.27248	0.000274609	CYP2A6	-2.84445	1.67663e-06
FOXQ1	2.32301	0.000389302	CYP2A7	-2.17468	1.93394e-06
BHMT	-2.39146	0.000393568	TRIM71	2.37144	2.42206e-06
NQO1	2.75436	0.000417852	TMEM45B	2.16554	2.52704e-06
THRSP	-2.55623	0.000418863	PRG4	-2.16402	2.62994e-06
CLRN3	-2.67692	0.0004203	SOX9	2.362	2.76559e-06
PCK1	-2.10921	0.000601489	PCK1	-2.90377	2.78595e-06
AKR1D1	-2.46192	0.000604481	C3P1	-2.2302	2.92572e-06
BCHE	-2.82132	0.000747501	CTH	-2.02713	4.24543e-06
C15orf48	2.23485	0.00081904	AKR1D1	-2.93531	5.53811e-06
GYS2	-2.59298	0.000825389	C6	-2.13316	6.01048e-06
SLC10A1	-2.23233	0.00136056	OAT	-2.22037	6.89301e-06
ERICH5	2.08912	0.00138374	CNTN3	-2.10145	8.16205e-06
CYP8B1	-2.63997	0.00146789	COX7B2	2.73884	8.41123e-06
SPP1	2.16408	0.0015398	SPP1	2.051	9.83174e-06
VNN1	-2.20562	0.00178821	TRIM16	2.07873	1.36888e-05
DHRS2	2.14304	0.00375707	BHMT	-2.25032	1.4686e-05
C9	-3.34734	0.00448066	GLYAT	-2.07828	1.49023e-05
HSD11B1	-2.1921	0.00493493	TMEM45A	-2.28591	1.82542e-05
MAGEA6	2.27632	0.00787838	CFHR4	-2.38359	1.9373e-05
S100P	2.2457	0.0082428	CLGN	2.28206	2.59934e-05
KRT23	2.14628	0.00998776	C9	-3.20406	2.73575e-05
CYP2E1	-2.14305	0.0104173	LCN2	2.29791	3.62308e-05
PEG10	2.03491	0.0222098	ERICH5	2.21595	3.84053e-05
			LGALS4	2.3706	5.59108e-05
			PDZK1IP1	2.49507	6.20809e-05
			NQO1	2.79476	6.79185e-05
			BBOX1	-2.38928	7.32587e-05
			ELOVL7	2.19659	0.000130551
			SLC10A1	-2.21745	0.000150046
			IFI27	2.24528	0.00015648
			VNN1	-2.07195	0.000210329
			F9	-2.32016	0.000216631
			SPP2	-2.02297	0.00023442
			HPGD	-2.19337	0.000271022
			CYP2E1	-2.95485	0.000405293
			CYP8B1	-2.2837	0.000516479
			LINC01419	2.42974	0.000601537
			MAGEA6	2.64629	0.000618083
			PAGE4	2.2078	0.000771078
			PEG10	2.29407	0.000936931
			HSD11B1	-2.17724	0.00180843
			HPD	-2.20881	0.00181532
			S100P	2.09301	0.00486302
